# Supplementary material
Source: publisher figshare collection journal article supplement (https://karger.figshare.com/ndownloader/files/22746338)
Supplement: Supplementary file 1 [file 22746338]

| **Target** | **Host** | **Katalogue nr** | **Company** |
| --- | --- | --- | --- |
| IL-32 | rabbit polyclonal | ab37158 | Abcam, United Kingdom |
| α-actin | rabbit polyclonal | A5228 | Sigma Aldrich, USA |
| CD3ε | rabbit polyclonal | BS6859 | Bioworld Technology, USA |
| CD68 | mouse monoclonal | NCL-CD68-KP1 | Leica Biosystems, Germany |
| Β-tubulin | rabbit polyclonal | MA5-16308 | Abcam, United Kingdom |
| von Willebrand factor | rabbit polyclonal | A0082 | Dako/Agilent, Sweden |
| isotypic control | mouse | MAB002 | R&D Systems, Inc., USA |
| isotypic control | rabbit | NB810-56910 | Novus Biologicals, USA |

Supplemental table 3. Antibodies used.
